# Supplementary material for: Bioinspired synthesis of Ag@TiO2 plasmonic nanocomposites to enhance the light harvesting of dye-sensitized solar cells
Source: Royal Society of Chemistry journal article supplement (doi:10.1039/c3ra42429d), 2013-01-01
Supplement: c3ra42429d.pdf [file c3ra42429d.pdf]

Electronic Supplementary Information

## Bioinspired synthesis of Ag@TiO<sub>2</sub> plasmonic nanocomposites to enhance the light harvesting of dye-sensitized solar cells

*Xiaoliang Zhang, Jianhua Liu, Songmei Li, Xiaohong Tan, Mei Yu, and Juan Du*

Dr. X. Zhang, Prof. J. Liu, Prof. S. Li, Prof. M. Yu, Dr. Juan Du

School of Materials Science and Engineering

Beihang University

Beijing 100191, China.

E-mail: [liujh@buaa.edu.cn](mailto:liujh@buaa.edu.cn)

Dr. X. Tan

Department of Chemistry and Center for Nucleic Acids Science and Technology

Carnegie Mellon University

Pittsburgh, PA 15213, United States.

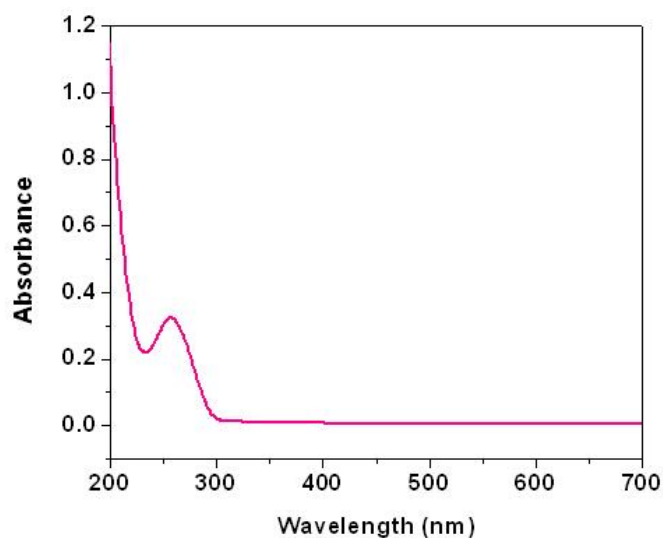

**Fig. S1** UV-vis absorption spectrum of collected plasmid DNA. The plasmid DNA has an absorption band at ~260 nm, which is consistent with the absorption band of DNA.<sup>1</sup> The concentration of the plasmid DNA is calculated based on the absorption values of Uv-vis absorption spectra.<sup>2</sup>

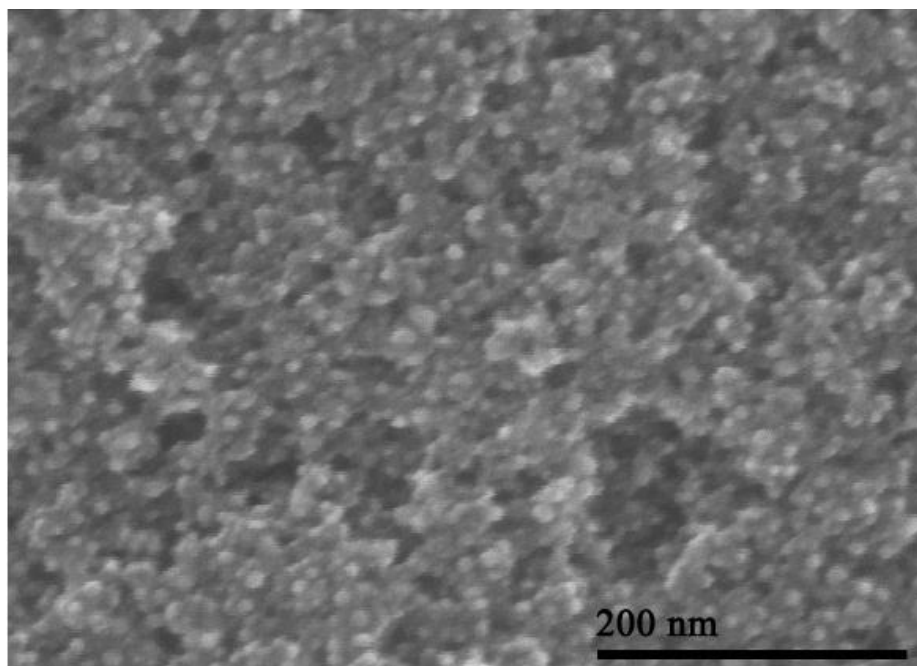

**Fig. S2** FESEM image of Ag@TiO<sub>2</sub> plasmonic nanocomposites.

### References

- 1 S. Kundu, K. Wang, D. Huitink and H. Liang, *Langmuir* 2009, **25**, 10146-10152.
- 2 H. Suzuki, T. Amano, T. Toyooka and Y. Ibuki, *Environ. Sci. Technol.* 2008, **42**, 8076-8082.
